# Supplementary material
Source: HighWire-hosted journal article supplement (https://bmjopen.bmj.com/content/8/7/e022056)
Supplement: inline-supplementary-material-2 [file inline-supplementary-material-2.pdf]

| Outcome                                       | Screen positive;<br>Aspirin<br>Group 3A<br><br>N=13 | Screen negative;<br>No Aspirin<br>Group 3B<br><br>N=171 | OR (95% CI)      |
|-----------------------------------------------|-----------------------------------------------------|---------------------------------------------------------|------------------|
| Preeclampsia No. (%)                          | 2 (15.4)                                            | 6 (3.5)                                                 | 5.0 (0.9 – 27.7) |
| Pre-eclampsia <34-weeks                       | 0 (0)                                               | 2 (1.2)                                                 | -                |
| Pre-eclampsia <37-weeks                       | 2 (15.4)                                            | 2 (1.2)                                                 | 15.4 (2.0 – 120) |
| Birthweight <10 <sup>th</sup> centile No. (%) | 4 (30.7)                                            | 21 (12.3)                                               | 3.2 (0.9 – 11.2) |
| Pre-term delivery <34 weeks No. (%)           | 1 (7.7)                                             | 1 (0.6)                                                 | 14.1 (0.8 – 240) |
| NICU admission No. (%)                        | 0 (0)                                               | 9 (5.3)                                                 | -                |
| Outcome No. (%)                               |                                                     |                                                         |                  |
| Alive at 6-weeks                              | 13 (100)                                            | 169 (98.8)                                              |                  |
| Stillbirth                                    | 0 (0)                                               | 2 (1.2)                                                 |                  |
| Neonatal death                                | 0 (0)                                               | 0 (0)                                                   |                  |

Table S2 - Secondary outcome measures in Group 3 (screen and treat)

(Expressed as average and standard deviation unless otherwise stated)

Note: ORs are not presented when number of events is 0 in the Screen –positive group.
