# Supplementary material
Source: HighWire-hosted journal article supplement (https://bmjopen.bmj.com/content/8/7/e022056)
Supplement: inline-supplementary-material-3 [file inline-supplementary-material-3.pdf]

| Adverse/Serious Adverse Event   | Low dose Aspirin<br>Group 1<br>N=179 | No-aspirin<br>Group 2<br>N=183 | Screen and treat<br>Group 3<br>N=184 |
|---------------------------------|--------------------------------------|--------------------------------|--------------------------------------|
| Adverse events                  |                                      |                                |                                      |
| Vaginal spotting No. (%)        | 27 (15.1)                            | 18 (9.8)                       | 12 (6.5)                             |
| Post-partum haemorrhage No. (%) |                                      |                                |                                      |
| >500mls                         | 25 (13.0)                            | 9 (4.9)                        | 12 (6.5)                             |
| >1000mls                        | 7 (3.6%)                             | 1 (0.5)                        | 4 (2.2)                              |
| Serious Adverse Events          |                                      |                                |                                      |
| NICU admission                  | 9 (5.0)                              | 7 (3.8)                        | 9 (4.9)                              |
| Perinatal Death                 | 2 (1.1)                              | 2 (1.1)                        | 2 (1.1)                              |
| Maternal admission              | 18 (10.1)                            | 15 (8.2)                       | 14 (7.6)                             |
| Congenital anomaly              | 3 (1.7)                              | 4 (2.2)                        | 3 (1.6)                              |
| Total serious adverse events    | 32 (17.8)                            | 28 (15.3)                      | 28 (15.2)                            |

Table S3 – Adverse and serious adverse events in all three groups. There may be >1 adverse event or serious adverse event per subject
